# Supplementary material for: Mining Heat-Resistant Key Genes of Peony Based on Weighted Gene Co-Expression Network Analysis
Source: MDPI journal article supplement (doi:10.3390/genes15030383), 2024-03-21

**Statistical table of the number of up-regulated and down-regulated transcription factors in the comparative group at the same time**

Table S1 Statistical table of the number of transcription factors up and down in the comparative group at the same time

| Comparison<br>transcription factor's family | HS0h vs CK0h |    |      | HS2h vs CK2h |    |      | HS6h vs CK6h |    |      | HS12h vs CK12h |    |      | HS24h vs CK24h |    |      |
|---------------------------------------------|--------------|----|------|--------------|----|------|--------------|----|------|----------------|----|------|----------------|----|------|
|                                             | total        | up | down | total        | up | down | total        | up | down | total          | up | down | total          | up | down |
| >AP2/ERF-AP2                                | -            | -  | -    | 2            | -  | 2    | -            | -  | -    | -              | -  | -    | -              | -  | -    |
| >AP2/ERF-ERF                                | 13           | 13 | -    | 27           | 11 | 16   | 22           | 9  | 13   | 26             | 14 | 12   | 28             | 13 | 15   |
| 33->B3                                      | 3            | 3  | -    | 9            | -  | 9    | 7            | -  | 7    | 8              | -  | 8    | 7              | 2  | 5    |
| >B3-ARF                                     | -            | -  | -    | 1            | -  | 1    | 1            | -  | 1    | -              | -  | -    | 1              | -  | 1    |
| BES1                                        | -            | -  | -    | -            | -  | -    | -            | -  | -    | -              | -  | -    | 1              | 1  | -    |
| bHLH                                        | 2            | 1  | 1    | 15           | -  | 15   | 12           | 1  | 11   | 17             | 1  | 16   | 13             | 1  | 12   |
| bZIP                                        | 2            | -  | 2    | 6            | 2  | 4    | 6            | 1  | 5    | 8              | -  | 8    | 7              | 1  | 6    |
| >C2C2-Dof                                   | 2            | -  | 2    | 6            | 1  | 5    | 5            | 1  | 4    | 6              | -  | 6    | 8              | 1  | 7    |
| C2C2-GATA                                   | -            | -  | -    | 4            | 1  | 3    | 3            | -  | 3    | 4              | -  | 4    | 5              | -  | 5    |
| >C2C2-LSD                                   | -            | -  | -    | -            | -  | -    | 1            | -  | 1    | 1              | -  | 1    | 1              | -  | 1    |
| C2C2-YABBY                                  | -            | -  | -    | 1            | -  | 1    | 2            | -  | 2    | 2              | -  | 2    | 1              | -  | 1    |
| C2H2                                        | 8            | -  | 8    | 18           | 3  | 15   | 17           | 1  | 16   | 22             | 2  | 20   | 14             | 2  | 12   |
| C3H                                         | -            | -  | -    | 3            | 1  | 2    | 4            | 1  | 3    | 8              | 1  | 7    | 6              | 1  | 5    |
| CPP                                         | -            | -  | -    | 2            | 1  | 1    | 1            | 1  | -    | 2              | 1  | 1    | -              | -  | -    |
| DBB                                         | -            | -  | -    | 1            | 1  | -    | -            | -  | -    | 1              | 1  | -    | -              | -  | -    |
| CSD                                         | -            | -  | -    | -            | -  | -    | 1            | 1  | -    | -              | -  | -    | -              | -  | -    |
| DBP                                         | -            | -  | -    | 2            | 1  | 1    | 2            | 1  | 1    | 2              | 1  | 1    | 2              | 1  | 1    |
| E2F-DP                                      | -            | -  | -    | 2            | -  | 2    | 1            | -  | 1    | 1              | -  | 1    | 2              | -  | 2    |
| FAR1                                        | 1            | 1  | -    | 5            | 4  | 1    | 4            | 4  | -    | 9              | 8  | 1    | 12             | 12 | -    |
| GARP-G2-like                                | -            | -  | -    | 5            | 1  | 4    | 2            | -  | 2    | 3              | -  | 3    | 5              | 2  | 3    |
| GeBP                                        | -            | -  | -    | -            | -  | -    | -            | -  | -    | 2              | 1  | 1    | 1              | -  | 1    |





Table S2A GO functional enrichment related to stress response in each module

| Module | GO ID      | Description                                 | GeneRatio | FDR      |
|--------|------------|---------------------------------------------|-----------|----------|
| Black  | GO:0009733 | response to auxin                           | 11/210    | 3.49E-09 |
|        | GO:0009735 | response to cytokinin                       | 9/210     | 4.83E-07 |
|        | GO:0009739 | response to gibberellin                     | 5/210     | 1.43E-05 |
|        | GO:0009751 | response to salicylic acid                  | 6/210     | 2.01E-05 |
|        | GO:0080167 | response to karrikin                        | 5/210     | 0.000138 |
|        | GO:0009737 | response to abscisic acid                   | 8/210     | 0.000196 |
|        | GO:0009611 | response to wounding                        | 6/210     | 0.000393 |
|        | GO:0033274 | response to vitamin B2                      | 2/210     | 0.000484 |
|        | GO:0009753 | response to jasmonic acid                   | 4/210     | 0.002034 |
|        | GO:0009723 | response to ethylene                        | 4/210     | 0.002040 |
| Blue   | GO:0009735 | response to cytokinin                       | 29/1391   | 8.25E-13 |
|        | GO:0009737 | response to abscisic acid                   | 23/1391   | 0.000228 |
|        | GO:0009733 | response to auxin telomere                  | 13/1391   | 0.015474 |
|        | GO:0043247 | maintenance in response to DNA damage       | 2/1391    | 0.021724 |
| Brown  | GO:0009737 | response to abscisic acid                   | 57/1564   | 1.62E-26 |
|        | GO:0006952 | defense response                            | 65/1564   | 8.71E-25 |
|        | GO:0080167 | response to karrikin                        | 28/1564   | 7.55E-20 |
|        | GO:0009611 | response to wounding                        | 33/1564   | 1.09E-15 |
|        | GO:0009735 | response to cytokinin                       | 30/1564   | 8.39E-13 |
|        | GO:0009753 | response to jasmonic acid                   | 15/1564   | 1.77E-06 |
|        | GO:0009751 | response to salicylic acid                  | 15/1564   | 3.32E-06 |
|        | GO:0009723 | response to ethylene                        | 14/1564   | 9.66E-06 |
|        | GO:0009741 | response to brassinosteroid                 | 8/1564    | 1.23E-05 |
|        | GO:0071215 | cellular response to abscisic acid stimulus | 8/1564    | 8.86E-05 |
| Module | GO ID      | Description                                 | GeneRatio | FDR      |

|               |                   |                                                     |                  |                 |
|---------------|-------------------|-----------------------------------------------------|------------------|-----------------|
| Cyan          | GO:0009737        | response to abscisic acid                           | 4/64             | 0.006219        |
|               | GO:0080167        | response to karrikin signal transduction            | 2/64             | 0.013056        |
|               | GO:0042770        | in response to DNA damage                           | 1/64             | 0.022230        |
|               | <b>GO:0034605</b> | <b>cellular response to heat</b>                    | <b>2/64</b>      | <b>0.030290</b> |
| Green         | GO:0009735        | response to cytokinin                               | 11/328           | 1.20E-06        |
|               | GO:1902884        | positive regulation of response to oxidative stress | 2/328            | 0.008439        |
|               | GO:0051788        | response to misfolded protein                       | 2/328            | 0.034165        |
|               | GO:0071244        | cellular response to carbon dioxide                 | 1/328            | 0.034165        |
| Greenyellow   | GO:0006952        | defense response                                    | 3/59             | 0.023757        |
|               | GO:0010468        | regulation of gene expression                       | 2/59             | 0.026097        |
| Grey60        | GO:0009751        | response to salicylic acid                          | 1/24             | 1.91E-03        |
|               | GO:0010037        | response to carbon dioxide                          | 1/24             | 3.40E-03        |
|               | GO:0006952        | defense response                                    | 1/24             | 1.08E-02        |
|               | GO:0009753        | response to jasmonic acid                           | 1/24             | 2.12E-02        |
|               | GO:0009723        | response to ethylene                                | 1/24             | 2.12E-02        |
| Lightgreen    | <b>GO:0009408</b> | <b>response to heat</b>                             | <b>1/15</b>      | <b>0.019175</b> |
| Lightyellow   | GO:0034599        | cellular response to oxidative stress               | 6/26             | 4.71E-08        |
|               | GO:0006979        | response to oxidative stress                        | 6/26             | 5.64E-08        |
|               | GO:0009753        | response to jasmonic acid                           | 6/26             | 0.017705        |
|               | GO:0009723        | response to ethylene                                | 6/26             | 0.017705        |
|               | GO:0009751        | response to salicylic acid                          | 6/26             | 0.018312        |
|               | GO:0009611        | response to wounding                                | 6/26             | 0.028472        |
| Magenta       | GO:0009737        | response to abscisic acid                           | 4/124            | 0.021673        |
|               | GO:0009735        | response to cytokinin                               | 3/124            | 0.028075        |
|               | GO:0009410        | response to xenobiotic stimulus                     | 1/124            | 0.040144        |
| <b>Module</b> | <b>GO ID</b>      | <b>Description</b>                                  | <b>GeneRatio</b> | <b>FDR</b>      |

|               |              |                                          |                  |            |
|---------------|--------------|------------------------------------------|------------------|------------|
| Magenta       | GO:0071369   | cellular response to ethylene stimulus   | 1/124            | 0.045417   |
| Midnightblue  | GO:0006970   | response to osmotic stress               | 3/36             | 0.001015   |
|               | GO:0070413   | trehalose metabolism in                  | 2/36             | 0.001015   |
|               | GO:0006952   | response to stress                       | 4/36             | 0.001421   |
|               | GO:0009611   | defense response                         | 3/36             | 0.001421   |
|               | GO:0009751   | response to salicylic acid               | 2/36             | 0.006295   |
|               | GO:0010037   | response to carbon dioxide               | 1/36             | 0.007911   |
|               | GO:0047484   | regulation of response to osmotic stress | 1/36             | 0.014638   |
|               | GO:0031347   | regulation of defense response           | 1/36             | 0.017353   |
|               | GO:0009741   | response to brassinosteroid              | 1/36             | 0.017361   |
|               | GO:0009737   | response to abscisic acid                | 2/36             | 0.017668   |
| Pink          | GO:0006979   | response to oxidative stress             | 3/61             | 0.023136   |
| Purple        | GO:0009723   | response to ethylene                     | 3/105            | 0.004724   |
|               | GO:0070413   | trehalose metabolism in                  | 2/105            | 0.004780   |
|               | GO:0009741   | response to stress                       | 2/105            | 0.006242   |
| Red           | GO:0009737   | response to brassinosteroid              | 2/105            | 0.006242   |
|               | GO:0009737   | response to abscisic acid                | 13/371           | 7.59E-06   |
|               | GO:0009753   | response to jasmonic acid                | 8/371            | 7.59E-06   |
|               | GO:0009751   | response to salicylic acid               | 8/371            | 1.02E-05   |
|               | GO:0080167   | response to karrikin                     | 6/371            | 0.000327   |
|               | GO:0009723   | response to ethylene                     | 5/371            | 0.003233   |
|               | GO:0006979   | response to oxidative stress             | 9/371            | 0.010205   |
| Salmon        | GO:0009739   | response to gibberellin                  | 3/371            | 0.018647   |
|               | GO:0009751   | response to salicylic acid               | 4/58             | 4.85E-05   |
| <b>Module</b> | <b>GO ID</b> | <b>Description</b>                       | <b>GeneRatio</b> | <b>FDR</b> |

|               |                   |                                                                   |                  |                 |
|---------------|-------------------|-------------------------------------------------------------------|------------------|-----------------|
| Salmon        | GO:0009733        | response to auxin                                                 | 3/58             | 0.004336        |
|               | GO:0080167        | response to karrikin                                              | 2/58             | 0.010037        |
|               | GO:0009753        | response to jasmonic acid                                         | 2/58             | 0.010773        |
|               | GO:0009723        | response to ethylene                                              | 2/58             | 0.010773        |
|               | GO:0009611        | response to wounding                                              | 2/58             | 0.022957        |
| Tan           | GO:0009735        | response to cytokinin                                             | 4/52             | 0.001980        |
|               | GO:0009739        | response to gibberellin                                           | 2/52             | 0.008496        |
|               | GO:0009744        | response to sucrose                                               | 2/52             | 0.008496        |
|               | <b>GO:0006950</b> | <b>response to stress</b>                                         | <b>2/52</b>      | <b>0.024999</b> |
|               | GO:0000749        | response to pheromone triggering conjugation with cellular fusion | 1/52             | 0.035051        |
|               | GO:0009737        | response to abscisic acid                                         | 2/52             | 0.036350        |
|               | <b>GO:0009408</b> | <b>response to heat</b>                                           | <b>2/52</b>      | <b>0.042258</b> |
| Turquoise     | GO:0009735        | response to cytokinin                                             | 45/2721          | 1.30E-16        |
|               | GO:0080167        | response to karrikin                                              | 29/2721          | 2.09E-14        |
|               | <b>GO:0006950</b> | <b>response to stress</b>                                         | <b>41/2721</b>   | <b>1.38E-13</b> |
|               | GO:0009611        | response to wounding                                              | 40/2721          | 1.44E-13        |
|               | GO:0009737        | response to abscisic acid                                         | 51/2721          | 1.09E-11        |
|               | GO:0009753        | response to jasmonic acid                                         | 27/2721          | 1.18E-11        |
|               | GO:0009744        | response to sucrose                                               | 16/2721          | 6.28E-07        |
|               | GO:0009739        | response to gibberellin                                           | 12/2721          | 0.000180        |
|               | GO:0009733        | response to auxin                                                 | 24/2721          | 0.000462        |
|               | GO:0071446        | cellular response to salicylic acid stimulus                      | 5/2721           | 0.000779        |
| Yellow        | <b>GO:0009408</b> | <b>response to heat</b>                                           | <b>114/1149</b>  | <b>8.26E-88</b> |
|               | GO:0042542        | response to hydrogen peroxide                                     | 54/1149          | 5.19E-46        |
|               | <b>GO:0006950</b> | <b>response to stress</b>                                         | <b>46/1149</b>   | <b>2.60E-32</b> |
|               | GO:0009266        | response to temperature stimulus                                  | 17/1149          | 2.29E-18        |
| <b>Module</b> | <b>GO ID</b>      | <b>Description</b>                                                | <b>GeneRatio</b> | <b>FDR</b>      |

|        |            |                                     |         |          |
|--------|------------|-------------------------------------|---------|----------|
| Yellow | GO:0009737 | response to abscisic acid           | 27/1149 | 3.77E-08 |
|        | GO:0000302 | response to reactive oxygen species | 10/1149 | 3.20E-05 |
|        | GO:0009739 | response to gibberellin             | 8/1149  | 0.000270 |
|        | GO:0009723 | response to ethylene                | 10/1149 | 0.000582 |
|        | GO:0080167 | response to karrikin                | 9/1149  | 0.001346 |
|        | GO:0009611 | response to wounding                | 13/1149 | 0.001687 |



Table S2B KEGG functional enrichment related to stress response in each module

| Module | KEGG ID | Description                                  | GeneRatio | FDR      |
|--------|---------|----------------------------------------------|-----------|----------|
| Black  | 02010   | ABC transporters                             | 8/70      | 1.87E-07 |
|        | 00062   | Fatty acid elongation                        | 6/70      | 2.63E-07 |
|        | 00592   | alpha-Linolenic acid metabolism              | 4/70      | 0.000833 |
|        | 00982   | Drug metabolism - cytochrome P450            | 4/70      | 0.003656 |
|        | 00980   | Metabolism of xenobiotics by cytochrome P450 | 4/70      | 0.004368 |
|        | 00983   | Drug metabolism - other enzymes              | 4/70      | 0.014158 |
|        | 00906   | Carotenoid biosynthesis                      | 2/70      | 0.014608 |
|        | 00944   | Flavone and flavonol biosynthesis            | 1/70      | 0.016054 |
| Blue   | 00480   | Glutathione metabolism                       | 4/70      | 0.016054 |
|        | 99976   | Replication and repair                       | 40/534    | 4.08E-27 |
|        | 00195   | Photosynthesis                               | 17/534    | 7.73E-11 |
|        | 00710   | Carbon fixation in photosynthetic organisms  | 26/534    | 3.62E-07 |
|        | 00540   | Lipopolysaccharide biosynthesis              | 5/534     | 0.000151 |
|        | 00680   | Methane metabolism                           | 19/534    | 0.000315 |
|        | 00196   | Photosynthesis - antenna proteins            | 7/534     | 0.002594 |
|        | 00630   | Glyoxylate and dicarboxylate metabolism      | 23/534    | 0.004000 |
| Brown  | 00196   | Photosynthesis - antenna proteins            | 76/678    | 2.4e-111 |
|        | 00195   | Photosynthesis                               | 22/678    | 1.99e-14 |
|        | 04075   | Plant hormone signal transduction            | 22/678    | 3.57e-12 |
|        | 00906   | Carotenoid biosynthesis                      | 11/678    | 6.11e-08 |
|        | 00902   | Monoterpenoid biosynthesis                   | 8/678     | 4.43e-06 |
|        | 00901   | Indole alkaloid biosynthesis                 | 6/678     | 1.12e-05 |
|        | 00460   | Cyanoamino acid metabolism                   | 14/678    | 1.61e-05 |

| Module      | KEGG ID | Description                                 | GeneRatio | FDR      |
|-------------|---------|---------------------------------------------|-----------|----------|
| Brown       | 00940   | Phenylpropanoid biosynthesis                | 16/678    | 1.75e-05 |
|             | 00053   | Ascorbate and aldarate metabolism           | 11/678    | 2.04e-05 |
|             | 00943   | Isoflavonoid biosynthesis                   | 4/678     | 0.000247 |
| green       | 00195   | Photosynthesis                              | 10/171    | 1.86e-08 |
|             | 00630   | Glyoxylate and dicarboxylate metabolism     | 11/171    | 0.013113 |
|             | 00073   | Cutin, suberine and wax biosynthesis        | 3/171     | 0.027191 |
|             | 04137   | Mitophagy - animal                          | 5/171     | 0.044994 |
|             | 99985   | Amino acid metabolism                       | 2/171     | 0.044994 |
| greenyellow | 00195   | Photosynthesis                              | 3/20      | 0.008439 |
| grey60      | 00943   | Isoflavonoid biosynthesis                   | 1/7       | 0.034165 |
|             | 04075   | Plant hormone signal transduction           | 1/7       | 0.034165 |
|             | 00900   | Terpenoid backbone biosynthesis             | 1/7       | 0.023757 |
|             | 00270   | Cysteine and methionine metabolism          | 1/7       | 0.026097 |
| lightcyan   | 00195   | Photosynthesis                              | 2/4       | 1.91E-03 |
| lightcyan   | 00710   | Carbon fixation in photosynthetic organisms | 1/4       | 3.40E-03 |
|             | 00630   | Glyoxylate and dicarboxylate metabolism     | 1/4       | 1.08E-02 |
| lightyellow | 00196   | Photosynthesis - antenna proteins           | 4/9       | 3.28e-09 |
|             | 00900   | Terpenoid backbone biosynthesis             | 2/9       | 0.000998 |
|             | 01051   | Biosynthesis of ansamycins                  | 1/9       | 0.008786 |
|             | 00195   | Photosynthesis                              | 1/9       | 0.017292 |
|             | 04142   | Lysosome                                    | 1/9       | 0.042798 |
|             | 00030   | Pentose phosphate pathway                   | 1/9       | 0.042798 |
|             | 00710   | Carbon fixation in photosynthetic organisms | 1/9       | 0.042798 |

| Module    | KEGG ID | Description                                           | GeneRatio | FDR      |
|-----------|---------|-------------------------------------------------------|-----------|----------|
| pink      | 00196   | Photosynthesis - antenna proteins                     | 3/32      | 0.000935 |
|           | 04064   | NF-kappa B signaling pathway                          | 2/32      | 0.033423 |
|           | 00630   | Glyoxylate and dicarboxylate metabolism               | 4/32      | 0.033423 |
| red       | 00521   | Streptomycin biosynthesis                             | 7/128     | 1.13e-05 |
|           | 00902   | Monoterpenoid biosynthesis                            | 4/128     | 0.000235 |
|           | 00562   | Inositol phosphate metabolism                         | 7/128     | 0.000235 |
|           | 00945   | Stilbenoid, diarylheptanoid and gingerol biosynthesis | 2/128     | 0.005551 |
|           | 00940   | Phenylpropanoid biosynthesis                          | 5/128     | 0.007361 |
|           | 00909   | Sesquiterpenoid and triterpenoid biosynthesis         | 3/128     | 0.009366 |
|           | 00941   | Flavonoid biosynthesis                                | 2/128     | 0.022217 |
|           | 00410   | beta-Alanine metabolism                               | 5/128     | 0.027393 |
|           | 00053   | Ascorbate and aldarate metabolism                     | 3/128     | 0.029614 |
|           | 00981   | Insect hormone biosynthesis                           | 2/128     | 0.029631 |
| tan       | 00480   | Glutathione metabolism                                | 3/26      | 0.042637 |
|           | 04075   | Plant hormone signal transduction                     | 2/26      | 0.042637 |
|           | 04016   | MAPK signaling pathway - plant                        | 2/26      | 0.042637 |
|           | 00982   | Drug metabolism - cytochrome P450                     | 2/26      | 0.042637 |
|           | 00980   | Metabolism of xenobiotics by cytochrome P450          | 2/26      | 0.042637 |
|           | 99976   | Replication and repair                                | 2/26      | 0.042637 |
| turquoise | 00195   | Photosynthesis                                        | 42/1347   | 4.68e-27 |
|           | 00902   | Monoterpenoid biosynthesis                            | 17/1347   | 2.94e-13 |

| Module    | KEGG ID | Description                                  | GeneRatio | FDR      |
|-----------|---------|----------------------------------------------|-----------|----------|
| turquoise | 00730   | Thiamine metabolism                          | 29/1347   | 5.48e-12 |
|           | 00710   | Carbon fixation in photosynthetic organisms  | 54/1347   | 9.36e-12 |
|           | 00630   | Glyoxylate and dicarboxylate metabolism      | 66/1347   | 7.33e-11 |
|           | 00460   | Cyanoamino acid metabolism                   | 26/1347   | 2.33e-09 |
|           | 00053   | Ascorbate and aldarate metabolism            | 17/1347   | 1.73e-06 |
|           | 00940   | Phenylpropanoid biosynthesis                 | 25/1347   | 2.60e-06 |
|           | 00592   | alpha-Linolenic acid metabolism              | 19/1347   | 1.13e-05 |
|           | 04075   | Plant hormone signal transduction            | 20/1347   | 1.20e-05 |
| yellow    | 04010   | MAPK signaling pathway                       | 56/557    | 1.08e-31 |
|           | 04144   | Endocytosis                                  | 58/557    | 6.95e-20 |
|           | 04151   | PI3K-Akt signaling pathway                   | 41/557    | 2.81e-16 |
|           | 04217   | Necroptosis                                  | 34/557    | 6.32e-14 |
|           | 00982   | Drug metabolism - cytochrome P450            | 16/557    | 3.11e-06 |
|           | 00980   | Metabolism of xenobiotics by cytochrome P450 | 16/557    | 8.30e-06 |
|           | 04075   | Plant hormone signal transduction            | 13/557    | 8.30e-06 |
|           | 00983   | Drug metabolism - other enzymes              | 16/557    | 0.000590 |
|           | 00940   | Phenylpropanoid biosynthesis                 | 12/557    | 0.000729 |
|           | 03060   | Protein export                               | 11/557    | 0.001493 |

Appendix S3 Color meaning table of 19 modules

| Table S3 Color meaning table of 19 modules |                                                                                     |                     |
|--------------------------------------------|-------------------------------------------------------------------------------------|---------------------|
| Number                                     | Color                                                                               | Module name         |
| 1                                          |    | Blue module         |
| 2                                          |    | Tan module          |
| 3                                          |    | Salmon module       |
| 4                                          |    | Yellow module       |
| 5                                          |    | Cyan module         |
| 6                                          |    | Black module        |
| 7                                          |    | Purple module       |
| 8                                          |    | Lightcyan module    |
| 9                                          |  | Lightyellow module  |
| 10                                         |  | Greenyellow module  |
| 11                                         |  | Magenta module      |
| 12                                         |  | Midnightblue module |
| 13                                         |  | Grey60 module       |
| 14                                         |  | Lightgreen module   |
| 15                                         |  | Turquoise module    |
| 16                                         |  | Pink module         |
| 17                                         |  | Red module          |
| 18                                         |  | Brown module        |

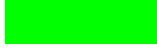

Supplement: s1 [file s1]
